# Supplementary material
Source: PubMed Central journal article supplement (PMC2891090)

9  
10  
11 **Supp. Figure 1: Cell displacements on thick matrices**  
12

- 13 A. Similar to trends observed with  $\langle \epsilon_{\phi\phi} \rangle$ ,  $\langle u_{\phi\phi} \rangle$  scales with  $E_{gel}$  in a power-law dependent  
14 manner, with stem cells being maximally mechanosensitive.  
15  
16  
17 B. Lateral propagation of displacements for a stem cell on gels of different stiffness. The  
18 common, characteristic decay length is  $\sim 0.25 R_{cell}$ .  
19  
20  
21  
22  
23

24 **Supp. Figure 2: Depth sensing: gel strain distributions**  
25

26 Individual interfacial strain components ( $\langle \epsilon_{rr} \rangle$ ,  $\langle \epsilon_{zz} \rangle$ ,  $\langle \epsilon_{rz} \rangle$ ,  $\langle \epsilon_{\theta\theta} \rangle$ ) plotted versus gel thickness  
27  
28 for different values of  $E_{gel}$  exhibit different transition regimes.  
29  
30  
31  
32

33 **Supp. Figure 3: Comparison of prestress distributions (soft gel)**  
34

35 Uniform prestress distribution, used in this paper is compared with edge prestress and interfacial  
36 prestress to study differences in the displacement and strain maps. In comparison to edge  
37 prestress, where peak displacements and strain compare well with those obtained with uniform  
38 prestress, where peak displacements and strain compare well with those obtained with uniform  
39 prestress, interfacial prestress produces very low displacement and strains.  
40  
41  
42  
43  
44  
45  
46  
47  
48  
49  
50  
51  
52  
53  
54  
55  
56  
57  
58  
59  
60  
61  
62  
63  
64  
65

# Figure S1

# Shamik Sen

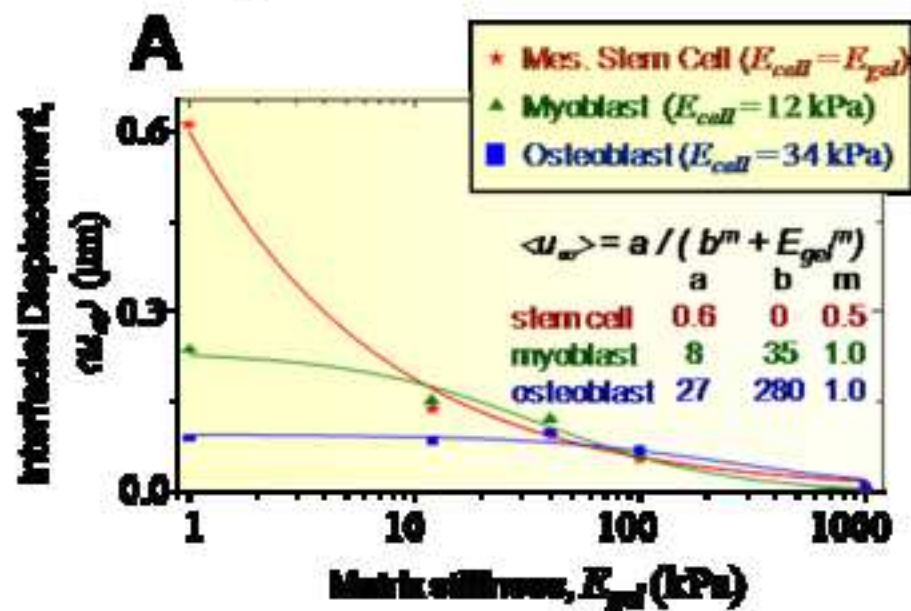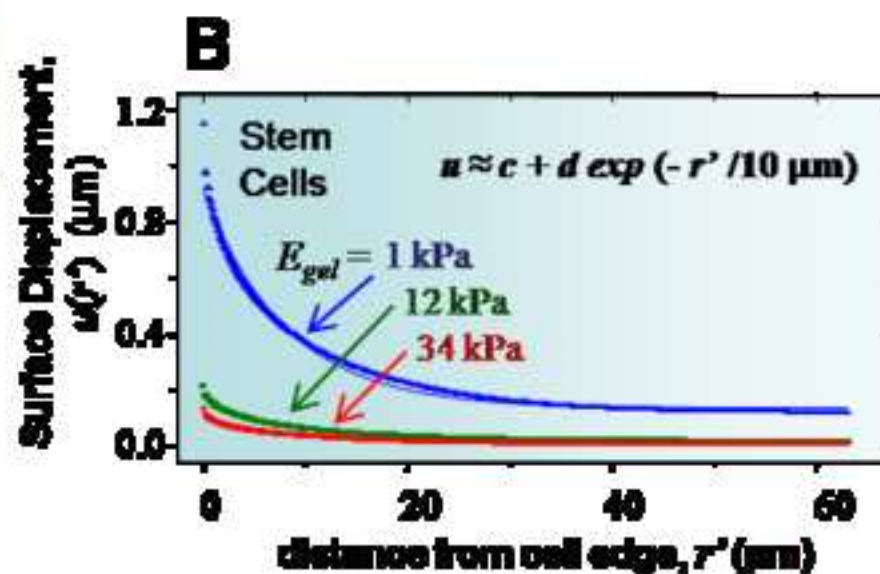

# Figure S2

# Shamik Sen

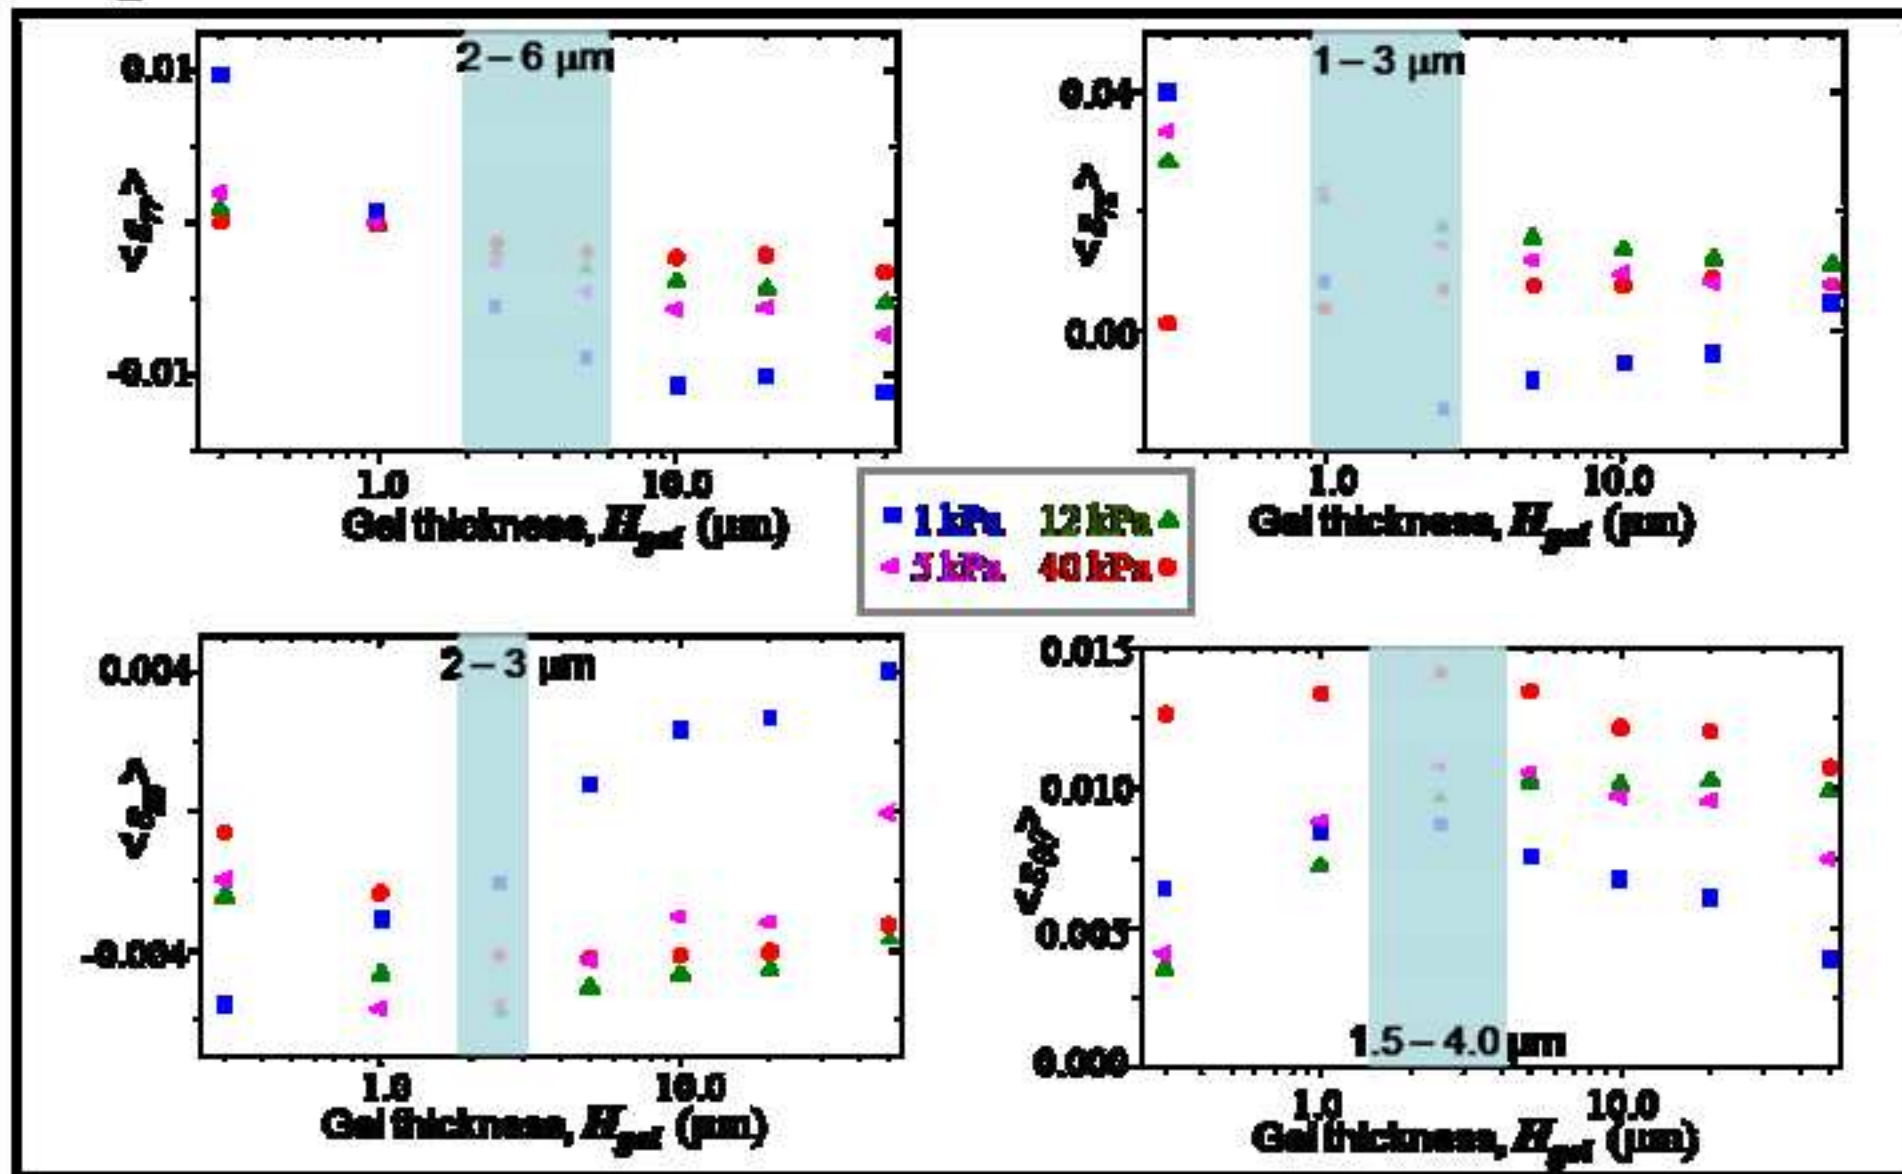

## Figure S3

Shamik Sen

### Uniform Prestress

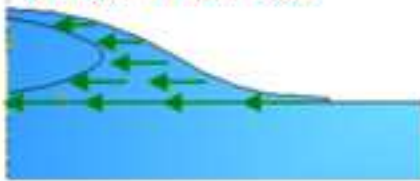

### Edge Prestress

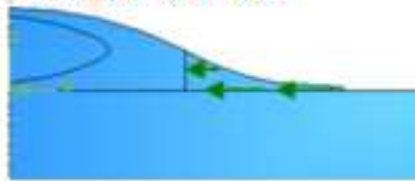

### Interfacial Prestress

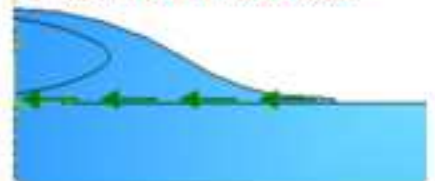

### Uniform Prestress

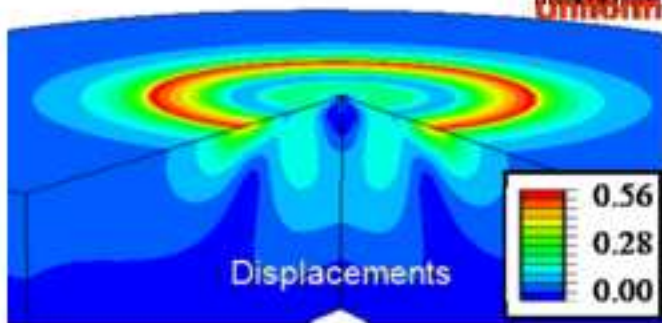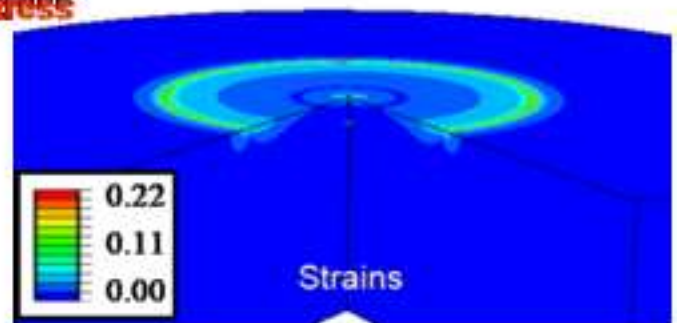

### Edge Prestress

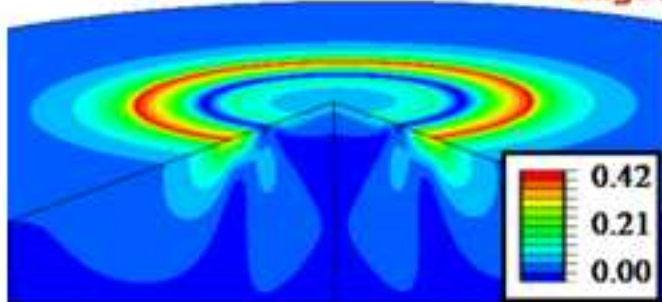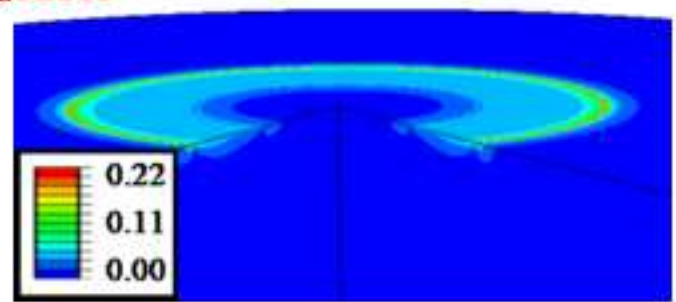

### Interfacial Prestress

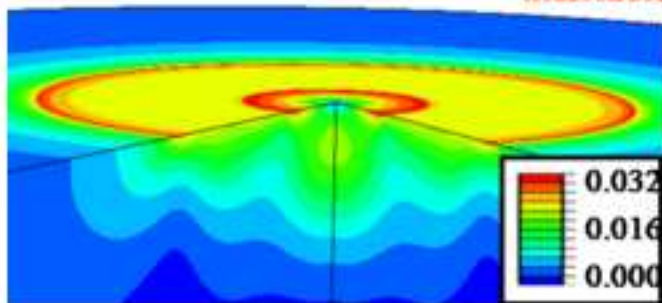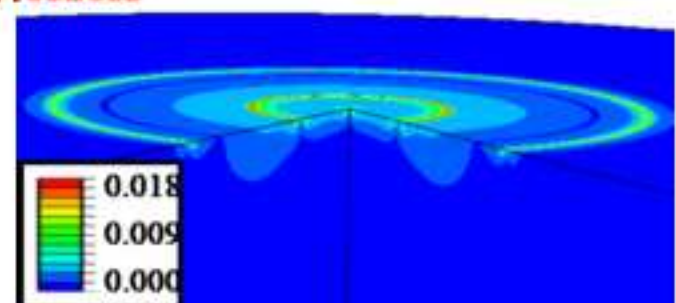

Supplement: NIHMS198177-supplement-01.pdf [file NIHMS198177-supplement-01.pdf]
